# Supplementary material for: Searching for Biological Function of the Mysterious PA2504 Protein from Pseudomonas aeruginosa
Source: MDPI journal article supplement (doi:10.3390/ijms22189833), 2021-09-11
Supplement: s1 [file s1]

## **Supporting Materials and Methods**

### **Bacterial transformation**

Competent *E. coli* cells were prepared by the standard  $\text{CaCl}_2$  method and plasmid DNA was introduced by heat shock method [59].

### **DNA manipulations**

Plasmids and *Pseudomonas* genomic DNA were purified using Plasmid Mini Kit and Genomic Mini Kit, respectively (A&A Biotechnology), according to the manufacturer's instructions.

To purify DNA from agarose, gel slices were cut out and processed using the Gel-Out system (A&A Biotechnology) according to the manufacturer's instructions. PCR amplification was performed using high fidelity Pfu DNA polymerase (Promega). Usually 30 cycles of amplification were performed, at reaction conditions depending on the primers and the size of the final amplification product. The PCR products were identified by agarose gel electrophoresis. All primers are listed in Table S2.

### **SDS-PAGE gel electrophoresis**

Routinely, proteins were separated in denaturing conditions by SDS-PAGE method [59] in 12% polyacrylamide gel. For visualization, proteins were stained with Coomassie Brilliant Blue.

### **Western blot**

The membrane was blocked for 1 h at room temperature in the TBS (10 mM Tris-Cl pH 8.0, 150 mM NaCl) blocking buffer (TBS, with 7% non-fat milk) and then for 1 h in the blocking buffer containing mouse primary antibody (anti His<sub>6</sub> diluted 1:3000, Sigma). In order to remove unbound antibodies, the membrane was washed four times with TBS containing 0.1% Tween-20 (TBST) and subsequently incubated with secondary anti-mouse antibodies conjugated with alkaline phosphatase (goat anti-mouse for anti-His<sub>6</sub> diluted 1:3000 in TBST). After 1 h, a series of 10-min washes was carried out with TBS, and the membrane was incubated for 10 min in AP buffer (100 mM NaCl, 100 mM Tris-Cl, 5 mM  $\text{MgCl}_2$  pH 9.5). Proteins were visualized by immersing the membrane in AP buffer containing alkaline phosphatase substrate NBT (nitro blue tetrazolium) and BCIP (5-bromo-4-chloro-3-indolyl-phosphate) substrates (Promega).

### **Biofilm production assay**

Overnight cultures of *P. aeruginosa* PAO1161 and mutant strains were diluted 1:100 in fresh L-broth medium in three replicates, and 100  $\mu\text{l}$  of each diluted culture was transferred into at least 8 wells on a 96-well plate. The plates were incubated statically at 37°C for approximately 20 h.  $\text{OD}_{600}$  was measured with a plate reader. The medium with planktonic bacteria was removed, the wells were washed three times with PBS, 200  $\mu\text{l}$  of 0.1% crystal violet solution was added to each well and incubated for 30 min at room temperature. The solution was removed, and the wells were washed three times with water and once with PBS. The plates were dried and 150  $\mu\text{l}$  of 96% ethanol was

added to dissolve the bound stain. After 10 min of incubation at room temperature, the solution was mixed by pipetting, OD<sub>590</sub> was determined, and the OD<sub>590</sub>/OD<sub>600</sub> ratio was calculated.

### **Motility assays**

The assays were performed according to [60]. Swimming plates (1% tryptone, 0.5% NaCl, 0.3% agar), swarming plates (0.8% nutrient broth, 0.5% dextrose, 0.5% agar), and twitching plates (1% bactotryptone, 0.5% NaCl, 1.5% agar) were inoculated from fresh overnight cultures on L-agar plates with a sterile toothpick and observed after incubation at 37°C for 24 h. Motility tests were repeated at least three times.

### **Antibiotic sensitivity tests**

Overnight cultures of *P. aeruginosa* PAO1161 and mutant strains were diluted 1:100 in 15 ml of fresh L-broth medium and incubated at 37°C to OD<sub>600</sub>=0.1. Bacteria were spread evenly on Mueller–Hinton plates (Biomaxima S.A; 17.6 g L<sup>-1</sup> casein hydrolase, 2.0 g L<sup>-1</sup> beef extract, 1.5 g L<sup>-1</sup> starch, 17.0 g L<sup>-1</sup> agar) to give a homogenous lawn, and antibiotic disks (Oxoid) were placed in the center of each plate. Antibiotics from different groups were used: cephalosporins (ceftazidime 10 µg, (CAZ)); quinolones (ciprofloxacin 5 µg, (CIP)); β-lactams: (imipenem 10 µg, (IPM); meropenem 10 µg, (MEM); piperacillin 100 µg (PRL)); polymyxins (polymyxin B 300 µg) (PB); colistin 10 µg (CT)) and aminoglycosides (tobramycin 10 µg, (TOB)). The plates were incubated at 37°C for 20 h, and the diameter of growth inhibition was measured. The tests were repeated several times.

### **Biolog Phenotype microarrays**

The Biolog system allows microarray based differentiation of growth phenotypes. It uses a redox technology, with cell respiration (NADH production) as a reporter. If the cells are metabolically active, they respire leading to the reduction of a tetrazolium dye present in the medium and thereby leading to coloration, proportional to the activity. A PM4A microarray was used to determine, in accordance with the manufacturer's instructions, the ability of *P. aeruginosa* to utilize different sulphur sources. (Biolog, Inc., Hayward, CA.). The IF-0 inoculation fluid was used with Dye Mix A, supplemented with sodium citrate (20mM) as a carbon source and leucine (152 mM). If needed, 200 µg ml<sup>-1</sup> chloramphenicol was added. The cells were inoculated from fresh overnight L-broth plates supplemented with antibiotics if needed. The bacteria were suspended in 15 ml of IF-0 to the transmittance (T) of 42% on a Biolog turbidimeter, and then diluted again six fold by combining with 75 ml of IF-0 to obtain a final density of 85% transmittance. The PM4A microarray was inoculated with cell suspensions at 100 µl per well and incubated at 37°C in an OmniLog PM instrument and monitored for colour change in the wells. The *P. aeruginosa* ΔPA2504 strain was compared with the wild-type PAO1161 strain and the PA2504 overproducing strain with the PAO1161 strain carrying pKGB empty vector.

**Table S1.** Bacterial strains used in this study

| Strain                                       | Description                                                                                                                        | Reference  |
|----------------------------------------------|------------------------------------------------------------------------------------------------------------------------------------|------------|
| <b><i>Escherichia coli</i> strains</b>       |                                                                                                                                    |            |
| S17-1                                        | <i>recA pro hsdR hsdM</i> T <sup>p</sup> <sup>R</sup> Sm <sup>R</sup> ΩRPT-Tc::Mu-Km::TnT                                          | [61]       |
| XL1-Blue<br>MRF'                             | Δ( <i>mcrA</i> )183 Δ( <i>mcrCB-hsdSMR-mrr</i> )173 <i>endA1 supE44</i><br><i>thi-1 recA1 gyrA96 relA1 lac</i> [F' <i>proAB</i>    | Stratagene |
| BL21-DE3                                     | <i>fhuA2 [lon] ompT gal</i> ( λDE3) [dcm] Δ <i>hsdS</i> λDE3 =λsBamHI ΔEcoRI-B<br><i>int::(lacI::PlacUV5::T7 gene 1) i21 Δnin5</i> | NEB        |
| <b><i>Pseudomonas aeruginosa</i> strains</b> |                                                                                                                                    |            |
| PAO1161 Rif <sup>R</sup>                     | leu-, r-, Rif <sup>R</sup>                                                                                                         | [62]       |
| ΔrppH                                        | leu-, r-, Rif <sup>R</sup> ΔrppH                                                                                                   | [5]        |
| ΔPA2504                                      | leu-, r-, Rif <sup>R</sup> ΔPA2504                                                                                                 | This work  |
| ΔPA2504ΔrppH                                 | leu-, r-, Rif <sup>R</sup> ΔPA2504 ΔrppH                                                                                           | This work  |

**Table S2.** Primers used in this study

| Primer | Sequence                        | Purpose                           |
|--------|---------------------------------|-----------------------------------|
| Δ25F1  | CGGAATTCCTGCAAGTCCTCTGAAG       | pAKE2504 construction             |
| Δ25R1  | AACTGCAGCGAGGCCATGTCGACT        | pAKE2504 construction             |
| Δ25F2  | AACTGCAGTGAGCCTCAGCCTG          | pAKE2504 construction             |
| Δ25R2  | CTGGATCCGAATACGGTGCTCCT         | pAKE2504 construction             |
| QE25F  | ATGGATCCGCCTCGTGGACCTT          | pQE2504 construction              |
| QE25R  | GCAAGCTTTCAACCCTCCGGTC          | pQE2504 construction              |
| GB25F  | CCGGAATTCATGAGAGGATCGCATCACCATC | pKGB2504 construction             |
| GB25R  | GCAAGCTTTCAACCCTCCGGTC          | pKGB2504 construction             |
| LgfF   | GCGAATTCATGCGTAAAGGC            | pKGBgfp2504 construction          |
| LgfR   | GCAAGCTTTTTGTACAGTTC            | pKGBgfp2504 construction          |
| L25F   | GCTCTAGAGCCTCGTGGACC            | pKGBgfp2504 construction          |
| L25R   | GTGAGCTCTCAACCCTCCGG            | pKGBgfp2504 construction          |
| KT25F  | CGCGGATCCCGCCTCGTGGACCTTG       | pKT2504 and p18C2504 construction |
| KT25R  | CCGGAATTCGATCAACCCTCCGGTCCCTG   | pKT2504 and p18C2504 construction |
| NTrpF  | CGCGGATCCCGTGATCGATTCCGATGG     | pNTrppH construction              |
| NTrpR  | CCGGAATTCGAGTCCCGCGCCAGAAG      | pNTrppH construction              |

**Table S3** Proteins identified by mass spectrometry analysis from bands cut from SDS-PAGE gel (Figure 8). For band 1 proteins with mass 35-48 kDa are included and for band 2 with mass 17-23.7 kDa. Given are: the Pseudomonas Genome Database ID; protein name; mascot score - reflects the combined scores of all observed mass spectra that can be matched to amino acid sequences within that protein, a higher score indicates a more confident match; queries matched - number of MS/MS spectra that were matched to given protein; unique sequences - number of unique sequences matched; emPAI - relative quantitation of the proteins in a mixture based on protein coverage by the peptide matches in a database search result. Listed are proteins with p-value  $\leq 0.05$ . Only proteins with two or more queries matched are included.

| PDB ID | Name   | Mass (kDa) | Score | Queries Matched | Unique sequences | emPAI |
|--------|--------|------------|-------|-----------------|------------------|-------|
| Band 1 |        |            |       |                 |                  |       |
| PA4265 | tufA   | 43.4       | 18091 | 336             | 28               | 42.26 |
| PA4407 | ftsZ   | 41.2       | 798   | 17              | 12               | 3.64  |
| PA2612 | serS   | 47.2       | 758   | 16              | 11               | 2.19  |
| PA0266 | davT   | 45.2       | 611   | 12              | 9                | 1.53  |
| PA4673 | PA4673 | 40.1       | 552   | 13              | 10               | 1.85  |
| PA4238 | rpoA   | 36.6       | 524   | 12              | 10               | 2.53  |
| PA3977 | hemL   | 45.4       | 468   | 10              | 7                | 1.53  |
| PA0425 | mexA   | 41.0       | 427   | 7               | 7                | 1.06  |
| PA4583 | PA4583 | 44.4       | 367   | 8               | 8                | 1.13  |
| PA3364 | amiC   | 42.8       | 351   | 8               | 7                | 0.99  |
| PA0546 | metK   | 42.7       | 337   | 7               | 6                | 0.80  |
| PA2127 | cgrA   | 47.6       | 327   | 7               | 7                | 0.85  |
| PA2623 | icd    | 45.6       | 324   | 9               | 9                | 1.30  |
| PA2950 | fabV   | 43.5       | 310   | 6               | 6                | 0.79  |
| PA2760 | oprQ   | 46.9       | 289   | 6               | 5                | 0.57  |
| PA2195 | hcnC   | 45.3       | 284   | 6               | 5                | 0.59  |
| PA4942 | hflK   | 44.0       | 282   | 5               | 5                | 0.62  |
| PA4785 | PA4785 | 45.9       | 267   | 7               | 7                | 0.90  |
| PA3617 | recA   | 36.9       | 257   | 6               | 6                | 0.98  |
| PA0302 | spuF   | 42.8       | 257   | 5               | 4                | 0.63  |
| PA2239 | pslI   | 40.6       | 229   | 6               | 6                | 0.86  |
| PA4408 | ftsA   | 44.6       | 205   | 4               | 4                | 0.46  |
| PA5304 | dadA   | 47.1       | 184   | 5               | 5                | 0.56  |
| PA1373 | fabF2  | 43.5       | 181   | 4               | 4                | 0.47  |
| PA4677 | PA4677 | 46.9       | 179   | 5               | 5                | 0.56  |
| PA5258 | PA5258 | 40.8       | 171   | 5               | 5                | 0.68  |
| PA3478 | rhlB   | 47.1       | 149   | 4               | 4                | 0.43  |
| PA2664 | fhp    | 43.7       | 147   | 4               | 4                | 0.47  |
| PA2965 | fabF1  | 43.5       | 145   | 3               | 3                | 0.34  |
| PA1609 | fabB   | 42.8       | 139   | 4               | 3                | 0.48  |
| PA0971 | tolA   | 37.9       | 129   | 2               | 2                | 0.25  |

| PA2945 | PA2946 | 39.5       | 127   | 4               | 4                | 0.50  |
|--------|--------|------------|-------|-----------------|------------------|-------|
| PA3891 | opuCA  | 43.3       | 126   | 2               | 2                | 0.21  |
| PA0354 | PA0354 | 43.8       | 119   | 4               | 4                | 0.47  |
| PA4939 | PA4939 | 42.5       | 115   | 3               | 3                | 0.35  |
| PA4498 | mdpA   | 44.1       | 98    | 2               | 2                | 0.21  |
| PA4786 | PA4786 | 47.2       | 97    | 3               | 3                | 0.31  |
| PA3147 | wbpJ   | 45.3       | 95    | 3               | 3                | 0.32  |
| PA1580 | gltA   | 47.7       | 95    | 3               | 3                | 0.30  |
| PA4302 | tadA   | 46.8       | 87    | 2               | 2                | 0.20  |
| PA3814 | iscS   | 44.7       | 81    | 3               | 3                | 0.33  |
| PA3949 | PA3949 | 42.4       | 80    | 2               | 2                | 0.22  |
| PA2345 | PA2345 | 44.7       | 66    | 2               | 2                | 0.21  |
| PA3981 | PA3981 | 38.4       | 64    | 2               | 2                | 0.24  |
| PA1288 | PA1288 | 45.6       | 60    | 2               | 2                | 0.20  |
| PDB ID | Name   | Mass (kDa) | Score | Queries Matched | Unique sequences | emPAI |
| Band 2 |        |            |       |                 |                  |       |
| PA4239 | rpsD   | 23.3       | 1961  | 41              | 17               | 23.95 |
| PA0139 | ahpC   | 20.5       | 1277  | 21              | 9                | 5.92  |
| PA4257 | rpsC   | 18.7       | 957   | 20              | 10               | 4.62  |
| PA1902 | phzD2  | 23.2       | 913   | 19              | 8                | 5.75  |
| PA2586 | gacA   | 23.6       | 800   | 17              | 9                | 10.32 |
| PA2000 | dhcB   | 23.2       | 575   | 9               | 3                | 1.60  |
| PA3152 | hisH2  | 22.7       | 495   | 14              | 5                | 2.23  |
| PA2126 | cgrC   | 23.7       | 422   | 9               | 5                | 1.55  |
| PA4440 | PA4440 | 22.3       | 408   | 9               | 4                | 1.68  |
| PA4256 | rplP   | 20.7       | 388   | 7               | 4                | 2.13  |
| PA1432 | lasI   | 22.7       | 312   | 10              | 5                | 2.90  |
| PA2007 | maiA   | 23.7       | 297   | 10              | 8                | 3.48  |
| PA1683 | PA1683 | 22.9       | 266   | 5               | 3                | 0.79  |
| PA4428 | sspA   | 23.6       | 235   | 5               | 3                | 0.75  |
| PA2222 | PA2222 | 23.4       | 168   | 3               | 2                | 0.46  |
| PA0762 | algU   | 22.2       | 162   | 5               | 3                | 0.82  |
| PA3624 | pcm    | 23.4       | 160   | 5               | 3                | 0.77  |
| PA3988 | lptE   | 22.9       | 158   | 4               | 3                | 0.79  |
| PA4263 | rplC   | 22.6       | 157   | 4               | 3                | 0.80  |
| PA4762 | grpE   | 20.7       | 151   | 4               | 2                | 0.54  |
| PA3754 | PA3754 | 22.9       | 130   | 3               | 2                | 0.48  |
| PA1847 | nfuA   | 21.1       | 125   | 3               | 2                | 0.52  |
| PA5143 | hisB   | 21.9       | 97    | 3               | 2                | 0.83  |
| PA3604 | erdR   | 23.5       | 95    | 3               | 3                | 0.76  |
| PA4449 | hisG   | 22.8       | 86    | 2               | 2                | 0.48  |
| PA4951 | orn    | 20.8       | 84    | 2               | 1                | 0.24  |
| PA4493 | roxR   | 20.6       | 81    | 2               | 1                | 0.24  |
| PA5564 | gidB   | 23.7       | 77    | 2               | 1                | 0.21  |
| PA1878 | PA1878 | 21.9       | 73    | 2               | 2                | 0.50  |

|        |        |      |    |   |   |      |
|--------|--------|------|----|---|---|------|
| PA4431 | PA4432 | 20.8 | 70 | 2 | 1 | 0,23 |
| PA3007 | lexA   | 22.5 | 66 | 2 | 2 | 0,48 |
| PA4047 | ribA   | 22.1 | 59 | 2 | 2 | 0,49 |

## Supporting Figures

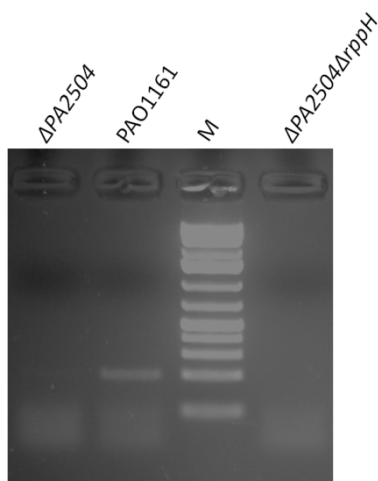

**Figure S1.** Expression of *PA2504* gene in *P. aeruginosa* wild-type PAO1161 and mutant  $\Delta PA2504$  and  $\Delta PA2504\Delta rppH$  strains analyzed by RT-PCR. Wild type PAO1161 cDNA was used as a positive control.

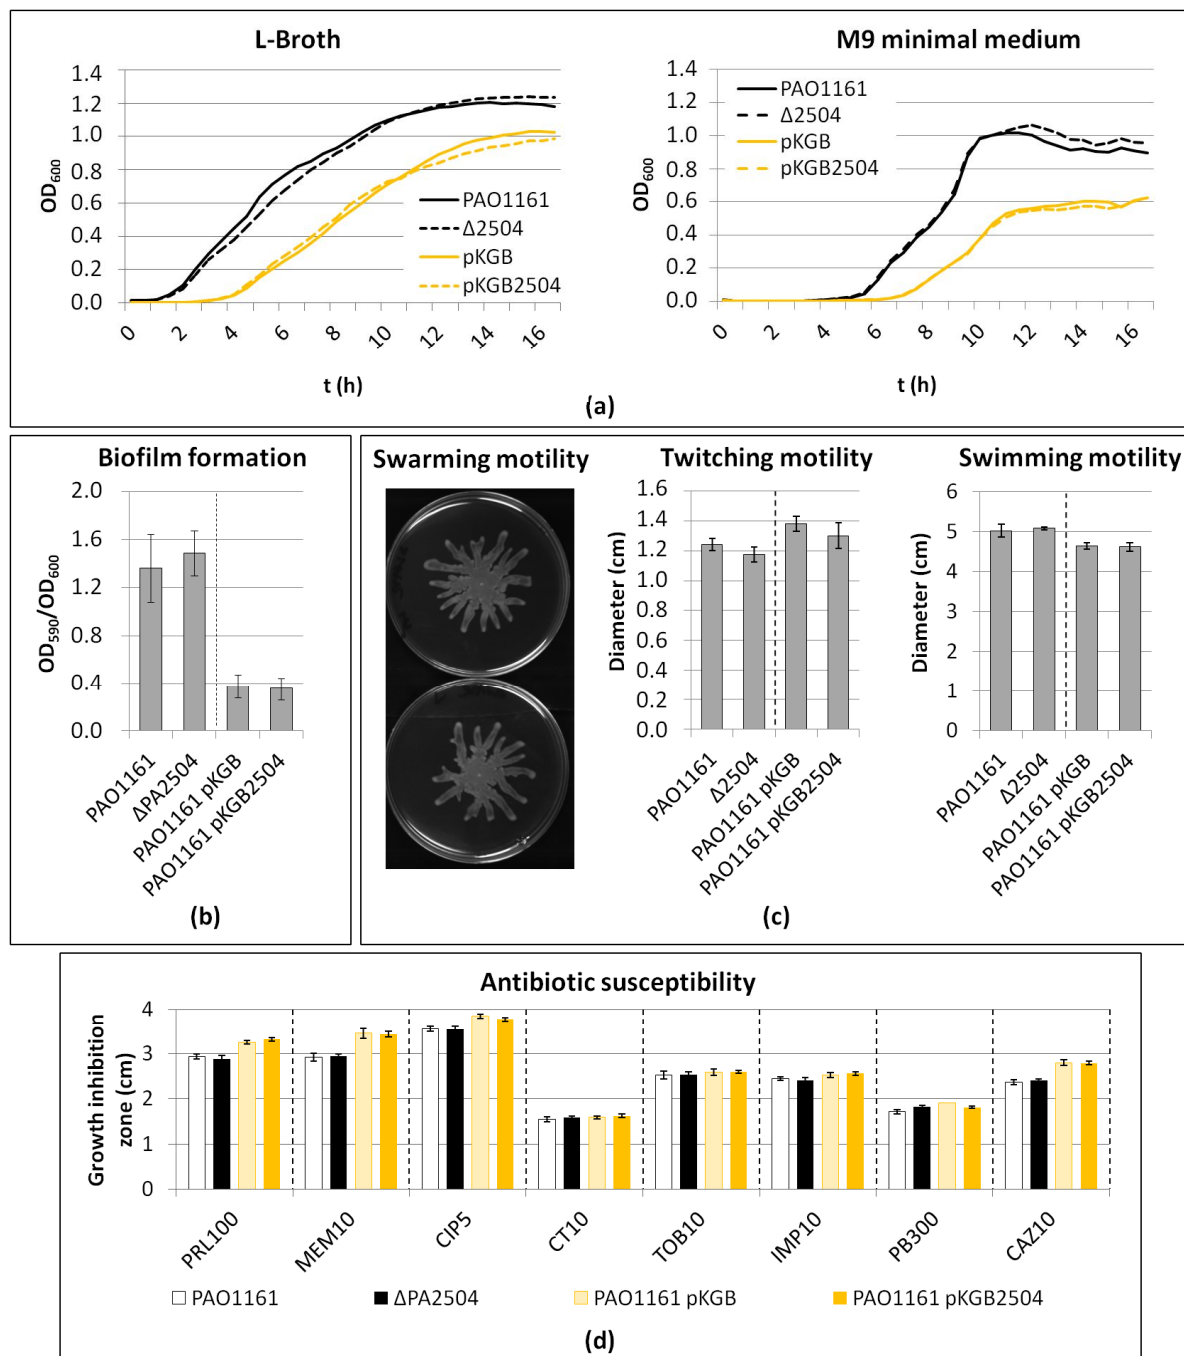

**Figure S2.** Effect of PA2504 deprivation and overproduction on growth, biofilm production, motility and antibiotic susceptibility of *P. aeruginosa*. **(a)** Growth curves of *P. aeruginosa* strains in L-broth rich medium and minimal M9 medium. **(b)** Effect of PA2504 deprivation and overproduction on biofilm formation capability **(c)** Effect of PA2504 deprivation and overproduction on swimming, swarming and twitching motility **(d)** Effect of PA2504 deprivation and overproduction on antibiotic susceptibility. In all experiments wild-type *P. aeruginosa* PAO1161 and  $\Delta$ PA2504 mutant were compared as well as the PAO1161 pKGB empty plasmid strain with the PA2504 protein overproducing PAO1161 pKGB2504 strain. All experiments were performed as described in supplementary Materials and Methods.

| pUT18C<br>pKT25 | RppH                                                                              | -----                                                                              |
|-----------------|-----------------------------------------------------------------------------------|------------------------------------------------------------------------------------|
|                 |                                                                                   |                                                                                    |
| PA2504          |  |  |
| -----           |  |  |

**Figure S3.** Interaction between PA2504 and RppH visualized with the use of BACTH system on MacConkey selective medium (red colonies). Negative control - expression of PA2504 or RppH in the presence of empty pUT18C and pKT25 vectors and co-transformation with two empty pKT25 and pUT18C vectors.

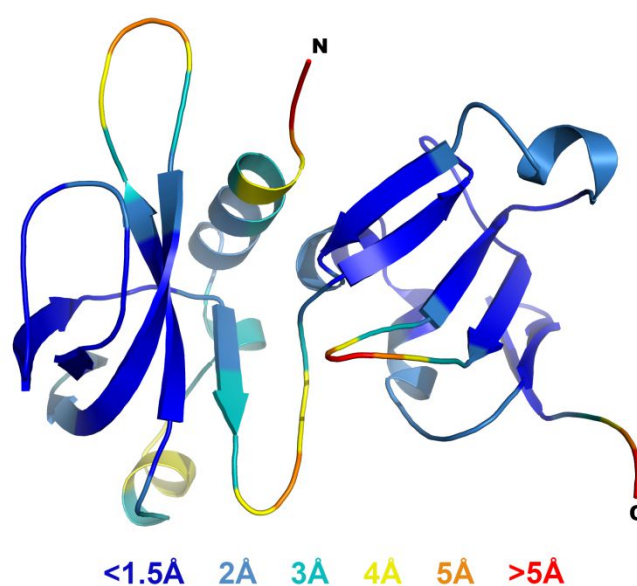

**Figure S4.** 3D model of PA2504 protein coloured according to trRosetta error estimates. The values reflect prediction uncertainties and in the case of homology modelling provide a distance between the model and the template.



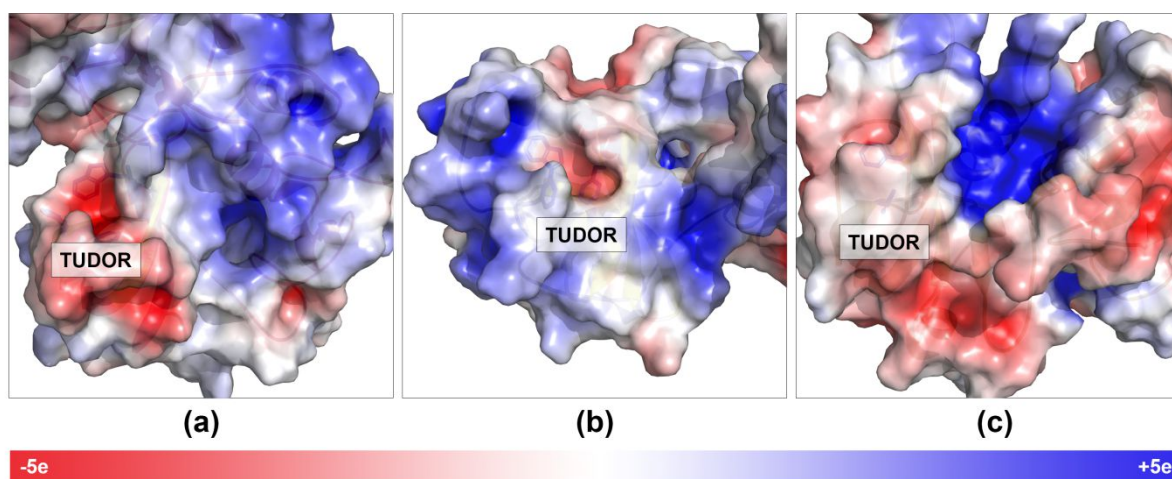

**Figure S5.** Molecular surfaces of TUDOR domains of (A) PHF1, (B) ZMYND8 and (C) PA2504 coloured according to calculated electrostatic potential. Molecules were rotated to ensure same orientation of TUDOR domain.

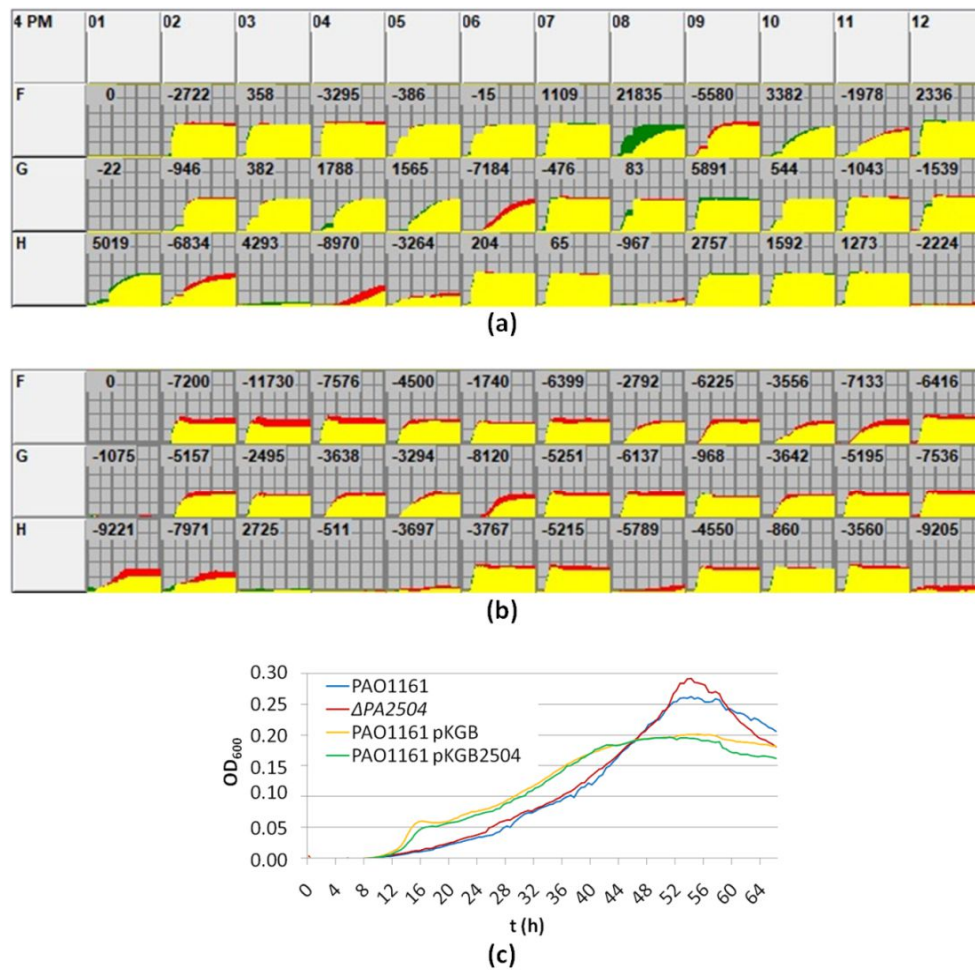

**Figure S6** Effect of PA2504 deprivation and overproduction on *P. aeruginosa* growth on different sulphur sources. PA4A Biolog system phenotype microarray was used to determine metabolic activity. **(a)** Comparison of  $\Delta$ PA2504 mutant (red) with wild type PAO1161 (green) strain. Yellow marks overlapping parts of curves. Difference between the strains is in well F8 with D-cysteine. **(b)** Comparison of the *P. aeruginosa* PAO1161 carrying pKGB empty plasmid (green) with the PAO1161 carrying pKGB2504 strain overexpressing PA2504 (red). Yellow marks overlapping parts of curves. The sulphur sources present in each well were: **F1**- none, negative control; **F2**- sulphate; **F3** – thiosulphate; **F4** – tetrathionate; **F5** – thiophosphate; **F6** - dithiophosphate; **F7** - L-cysteine; **F8** - D-cysteine; **F9** - L-cysteinyglycine; **F10** - L-cysteic acid; **F11** – cysteamine; **F12** - L-cysteine sulphonic acid; **G1**- N-acetyl-L-cysteine; **G2** - S-methyl-L-cysteine; **G3** – cystathionine; **G4** – lanthionine; **G5** – glutathione; **G6** - D,L-ethionine; **G7** - L-methionine; **G8** - D-methionine; **G9** - glycyl-L-methionine; **G10** - N-acetyl-D,L-methionine; **G11** - L-methionine sulfoxide; **G12** - L-methionine sulphone; **H1** – L-djenkolic acid; **H2** – thiourea; **H3** - L-thio- $\beta$ -D-glucose; **H4** d,l-lipoamide; **H5** - taurocholic acid; **H6** - taurine; **H7** – hypotaurine; **H8** - P-amino benzene sulphonic acid; **H9** - butane sulphonic acid; **H10** - 2-hydroxyethane sulphonic acid; **H11** - methane sulphonic acid; **H12** – tetramethylene sulphone. **(c)** Growth curves of the *P. aeruginosa* strains in modified M9 minimal medium supplemented with 0.5 mM D-cysteine. The experiments were performed as described in supplementary Materials and Methods.

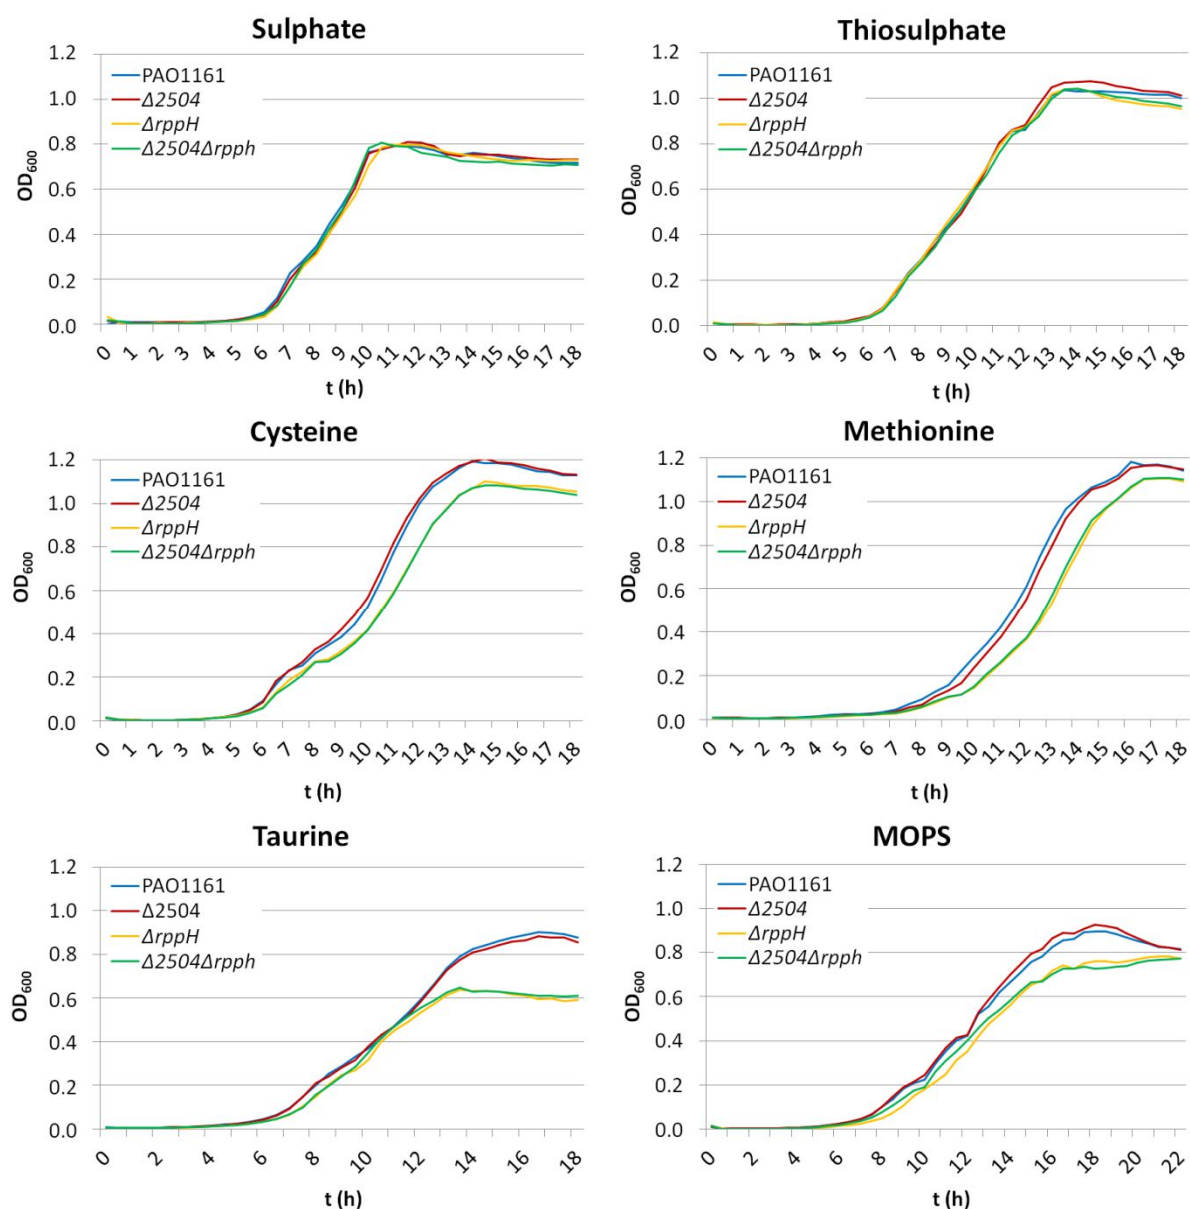

**Figure S7.** Growth curves of the *P. aeruginosa* wild-type PAO1161 and  $\Delta rppH$ ,  $\Delta PA2504$  and  $\Delta PA2504\Delta rppH$  mutant strains in modified M9 minimal medium supplemented with sulphur source indicated (0.5 mM).

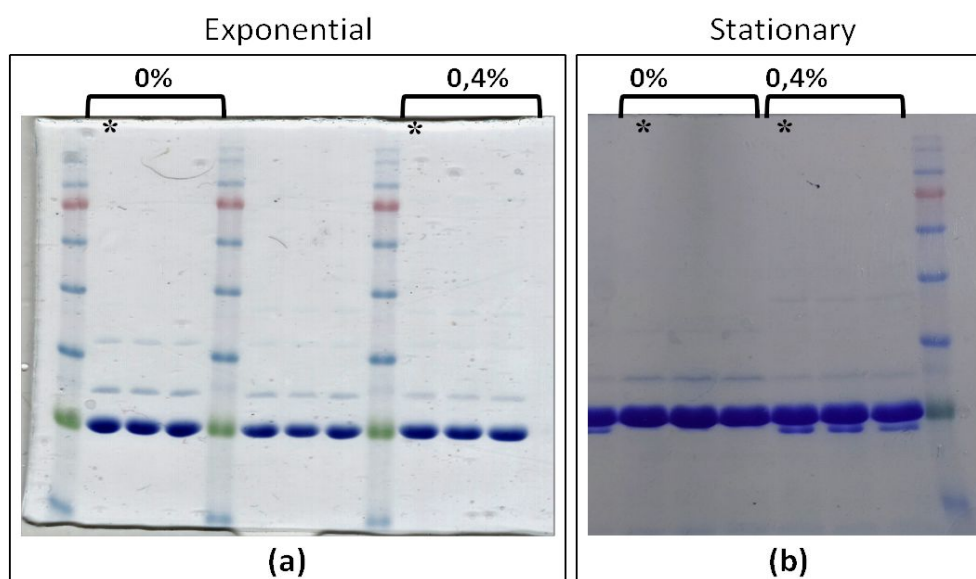

**Figure S8.** Uncropped pictures of SDS-PAGE gels used to prepare main text figure 8. (a) exponential phase of growth. (b) stationary phase of growth. Lanes used to prepare Figure 8 are marked with asterisk.

### Supporting reference list

59. Sambrook, J.; Fritsch, E.F.; Maniatis, T. *Molecular Cloning: A Laboratory Manual* 2nd. ed.; Cold Spring Harbor Laboratory Press: Cold Spring Harbor, NY, USA, 1989; ISBN 978-0-87969-309-1.
60. Rashid, M.H.; Kornberg, A. Inorganic Polyphosphate Is Needed for Swimming, Swarming, and Twitching Motilities of *Pseudomonas Aeruginosa*. *Proc. Natl. Acad. Sci. USA* **2000**, *97*, 4885–4890, doi:10.1073/pnas.060030097.
61. Simon, R.; O'Connell, M.; Labes, M.; Pühler, A. Plasmid vectors for the genetic analysis and manipulation of rhizobia and other gram-negative bacteria. In *Methods in Enzymology*; Elsevier: Amsterdam, The Netherlands, 1986; Volume 118, pp. 640–659; ISBN 978-0-12-182018-3.
62. Lasocki, K.; Bartosik, A.A.; Mierzejewska, J.; Thomas, C.M.; Jagura-Burdzy, G. Deletion of the *ParA* (*Soj*) Homologue in *Pseudomonas Aeruginosa* Causes ParB Instability and Affects Growth Rate, Chromosome Segregation, and Motility. *J. Bacteriol.* **2007**, *189*, 5762–5772, doi:10.1128/JB.00371-07.
